# Supplementary material for: β-Glucosidase from tartary buckwheat immobilization on bifunctionalized nano-magnetic iron oxide and its application in tea soup for aroma and flavonoid aglycone enhancement
Source: Royal Society of Chemistry journal article supplement (doi:10.1039/c9fo00283a), 2019-01-01
Supplement: c9fo00283a1.pdf [file c9fo00283a1.pdf]

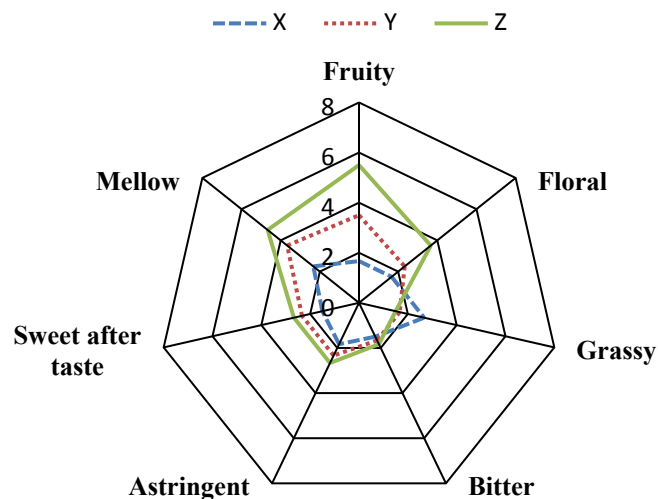

Fig. S1. Spider plot for sensory characteristic of Biluochun teas. X, treated without immobilized BG; Y, treated in a ratio of 5:1 (tea: immobilized BG, m/m); Z, treated in a ratio of 2:1 (tea: immobilized BG, m/m).

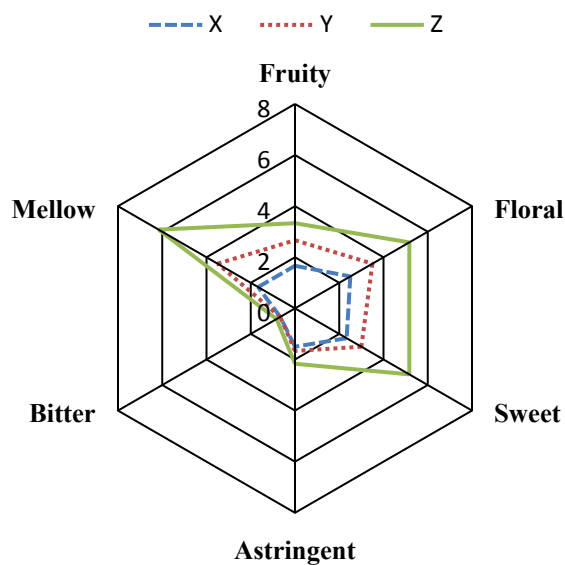

Fig. S2. Spider plot for sensory characteristic of Dianhong teas. X, treated without immobilized BG; Y, treated in a ratio of 5:1 (tea: immobilized BG, m/m); Z, treated in a ratio of 2:1 (tea: immobilized BG, m/m).
